# Supplementary material for: Multiscale Entropy Algorithms to Analyze Complexity and Variability of Trunk Accelerations Time Series in Subjects with Parkinson’s Disease
Source: MDPI journal article supplement (doi:10.3390/s23104983), 2023-05-22
Supplement: s1 [file s1]

# SUPPLEMENTARY MATERIAL

Table S1. Differences in entropy measures between swPD and HS.

| Entropy measure | Direction | $\tau$   | swPD [mean (SD)] | HS [mean (SD)] | p      | Cohen's d |
|-----------------|-----------|----------|------------------|----------------|--------|-----------|
| MSE             | AP        | $\tau$ 1 | 0.35 (0.10)      | 0.30 (0.06)    | 0.00   | 0.66      |
|                 |           | $\tau$ 2 | 0.45 (0.15)      | 0.38 (0.09)    | 0.00   | 0.61      |
|                 |           | $\tau$ 3 | 0.52 (0.17)      | 0.42 (0.12)    | < 0.00 | 0.68      |
|                 |           | $\tau$ 4 | 0.56 (0.20)      | 0.44 (0.14)    | < 0.00 | 0.74      |
|                 |           | $\tau$ 5 | 0.59 (0.22)      | 0.45 (0.15)    | < 0.00 | 0.71      |
|                 |           | $\tau$ 6 | 0.60 (0.23)      | 0.46 (0.16)    | < 0.00 | 0.72      |
|                 | ML        | $\tau$ 1 | 0.38 (0.14)      | 0.32 (0.09)    | 0.01   | 0.56      |
|                 |           | $\tau$ 2 | 0.48 (0.20)      | 0.38 (0.12)    | 0.00   | 0.62      |
|                 |           | $\tau$ 3 | 0.55 (0.25)      | 0.42 (0.15)    | 0.00   | 0.64      |
|                 |           | $\tau$ 4 | 0.60 (0.29)      | 0.44 (0.17)    | 0.00   | 0.66      |
|                 |           | $\tau$ 5 | 0.64 (0.33)      | 0.46 (0.18)    | 0.00   | 0.66      |
|                 |           | $\tau$ 6 | 0.65 (0.34)      | 0.48 (0.20)    | 0.01   | 0.59      |
|                 | V         | $\tau$ 1 | 0.33 (0.10)      | 0.28 (0.09)    | 0.00   | 0.54      |
|                 |           | $\tau$ 2 | 0.43 (0.15)      | 0.34 (0.12)    | < 0.00 | 0.66      |
|                 |           | $\tau$ 3 | 0.49 (0.19)      | 0.38 (0.14)    | < 0.00 | 0.68      |
|                 |           | $\tau$ 4 | 0.52 (0.22)      | 0.38 (0.16)    | < 0.00 | 0.73      |
|                 |           | $\tau$ 5 | 0.54 (0.24)      | 0.40 (0.16)    | 0.00   | 0.69      |
|                 |           | $\tau$ 6 | 0.55 (0.25)      | 0.40 (0.17)    | 0.00   | 0.70      |
| RCMSE           | AP        | $\tau$ 1 | 0.31 (0.09)      | 0.26 (0.07)    | 0.01   | 0.63      |
|                 |           | $\tau$ 2 | 0.38 (0.12)      | 0.32 (0.09)    | 0.02   | 0.55      |
|                 |           | $\tau$ 3 | 0.42 (0.14)      | 0.34 (0.10)    | 0.01   | 0.60      |
|                 |           | $\tau$ 4 | 0.44 (0.17)      | 0.35 (0.11)    | 0.00   | 0.64      |
|                 |           | $\tau$ 5 | 0.46 (0.18)      | 0.36 (0.12)    | 0.00   | 0.63      |
|                 |           | $\tau$ 6 | 0.47 (0.20)      | 0.37 (0.12)    | 0.00   | 0.62      |
|                 | ML        | $\tau$ 1 | 0.31 (0.11)      | 0.27 (0.08)    | 0.01   | 0.49      |
|                 |           | $\tau$ 2 | 0.38 (0.16)      | 0.31 (0.11)    | 0.01   | 0.53      |
|                 |           | $\tau$ 3 | 0.43 (0.20)      | 0.33 (0.13)    | 0.01   | 0.53      |
|                 |           | $\tau$ 4 | 0.45 (0.24)      | 0.35 (0.14)    | 0.01   | 0.54      |
|                 |           | $\tau$ 5 | 0.48 (0.27)      | 0.37 (0.14)    | 0.01   | 0.52      |
|                 |           | $\tau$ 6 | 0.50 (0.30)      | 0.38 (0.15)    | 0.02   | 0.50      |
|                 | V         | $\tau$ 1 | 0.28 (0.09)      | 0.24 (0.08)    | 0.00   | 0.52      |
|                 |           | $\tau$ 2 | 0.35 (0.13)      | 0.28 (0.11)    | 0.01   | 0.58      |

|          |          |             |             |        |      |
|----------|----------|-------------|-------------|--------|------|
|          | $\tau$ 3 | 0.38 (0.17) | 0.29 (0.13) | 0.00   | 0.62 |
|          | $\tau$ 4 | 0.40 (0.19) | 0.30 (0.13) | 0.01   | 0.63 |
|          | $\tau$ 5 | 0.41 (0.20) | 0.31 (0.14) | 0.01   | 0.61 |
|          | $\tau$ 6 | 0.42 (0.21) | 0.31 (0.14) | 0.01   | 0.60 |
| CI MSE   | AP       | 2.59 (0.89) | 2.06 (0.59) | < 0.00 | 0.71 |
|          | ML       | 2.78 (1.29) | 2.10 (0.75) | 0.00   | 0.64 |
|          | V        | 2.42 (0.96) | 1.84 (0.69) | < 0.00 | 0.70 |
| CI RCMSE | AP       | 2.08 (0.75) | 1.69 (0.49) | 0.01   | 0.63 |
|          | ML       | 2.14 (1.07) | 1.68 (0.62) | 0.01   | 0.53 |
|          | V        | 1.90 (0.82) | 1.45 (0.06) | 0.01   | 0.61 |

swPD, subjects with Parkinson's disease; HS, age and gait speed – matched healthy subjects; p, significance level at 95% CI in Mann – Whitney procedure; MSE, multiscale sample entropy; RCMSE, refined composite multiscale entropy; CI, complexity index; AP, antero-posterior direction of the acceleration signal; ML, medio-lateral direction of the acceleration signal; V, vertical direction of the acceleration signal.

Table S2. Discriminative ability of the entropy measures

| Entropy measure | Tau                | AUC (95% CI)       | OCP         | F1 score | Se+SP | Youden index | DOR  | LR+  | LR-  | PTP+ | PTP- $\Delta$ PTP | PTP+<br><i>adj</i> | PTP-<br><i>adj</i> | $\Delta$ PTP<br><i>adj</i> |           |   |
|-----------------|--------------------|--------------------|-------------|----------|-------|--------------|------|------|------|------|-------------------|--------------------|--------------------|----------------------------|-----------|---|
| MSE AP          | t1                 | 0.69 (0.58 - 0.79) | $\geq 0.28$ | 0.71     | 1.32  | 0.32         | 4.98 | 1.62 | 0.33 | 61   | 24                | 37                 | 22                 | 6                          | 16        | * |
|                 | t2                 | 0.68 (0.56 - 0.77) | $\geq 0.34$ | 0.69     | 1.27  | 0.27         | 3.70 | 1.48 | 0.40 | 59   | 27                | 32                 | 21                 | 7                          | 14        | * |
|                 |                    |                    | $\geq 0.42$ | 0.65     | 1.32  | 0.32         | 3.78 | 2.04 | 0.54 | 66   | 34                | 32                 | 52                 | 23                         | 29        |   |
|                 | t3                 | 0.70 (0.59 - 0.79) | $\geq 0.49$ | 0.68     | 1.42  | 0.42         | 6.58 | 3.16 | 0.48 | 75   | 32                | 43                 | 63                 | 21                         | 42        | * |
|                 | t4                 | 0.71 (0.59 - 0.80) | $\geq 0.53$ | 0.70     | 1.45  | 0.45         | 8.73 | 3.93 | 0.45 | 79   | 30                | <b>49</b>          | 68                 | 20                         | <b>48</b> | * |
|                 | t5                 | 0.70 (0.58 - 0.79) | $\geq 0.45$ | 0.68     | 1.27  | 0.27         | 3.25 | 1.53 | 0.47 | 59   | 31                | 28                 | 45                 | 20                         | 25        | * |
|                 |                    |                    | $\geq 0.60$ | 0.64     | 1.41  | 0.41         | 8.66 | 4.59 | 0.53 | 82   | 34                | <b>48</b>          | 71                 | 22                         | <b>49</b> |   |
| t6              | 0.70 (0.59 - 0.79) | $\geq 0.43$        | 0.69        | 1.29     | 0.29  | 3.80         | 1.55 | 0.41 | 60   | 28   | 32                | 45                 | 18                 | 27                         | *         |   |
|                 |                    |                    | $\geq 0.63$ | 0.62     | 1.38  | 0.38         | 6.63 | 3.78 | 0.57 | 78   | 35                | 43                 | 67                 | 23                         | 44        | * |
| MSE ML          | t 1                | 0.67 (0.55 - 0.77) | $\geq 0.32$ | 0.69     | 1.32  | 0.32         | 3.99 | 1.76 | 0.44 | 63   | 30                | 33                 | 49                 | 19                         | 30        | * |
|                 |                    |                    | $\geq 0.4$  | 0.65     | 1.40  | 0.40         | 6.31 | 3.28 | 0.52 | 76   | 33                | 43                 | 64                 | 22                         | 42        |   |
|                 | t 2                | 0.69 (0.57 - 0.78) | $\geq 0.35$ | 0.69     | 1.27  | 0.27         | 3.51 | 1.49 | 0.43 | 59   | 29                | 30                 | 45                 | 19                         | 26        | * |
|                 |                    |                    | $\geq 0.40$ | 0.68     | 1.40  | 0.40         | 5.86 | 2.87 | 0.49 | 73   | 32                | 41                 | 61                 | 21                         | 40        |   |
|                 | t3                 | 0.69 (0.56 - 0.78) | $\geq 0.35$ | 0.68     | 1.23  | 0.23         | 3.49 | 1.98 | 0.57 | 65   | 35                | 30                 | 52                 | 23                         | 29        | * |
|                 |                    |                    | $\geq 0.52$ | 0.68     | 1.42  | 0.42         | 6.58 | 3.16 | 0.48 | 75   | 32                | 43                 | 63                 | 21                         | 42        |   |
|                 | t 4                | 0.69 (0.57 - 0.79) | $\geq 0.53$ | 0.69     | 1.42  | 0.42         | 6.11 | 2.80 | 0.46 | 73   | 30                | 43                 | 60                 | 20                         | 40        | * |
| $\geq 0.59$     |                    |                    | 0.66        | 1.42     | 0.42  | 7.24         | 3.69 | 0.51 | 78   | 33   | <b>45</b>         | 67                 | 22                 | <b>45</b>                  |           |   |
| t 5             | 0.69 (0.57 - 0.78) | $\geq 0.43$        | 0.69        | 1.30     | 0.30  | 3.93         | 1.63 | 0.42 | 61   | 28   | 33                | 47                 | 18                 | 29                         | *         |   |
|                 |                    |                    | $\geq 0.63$ | 0.63     | 1.38  | 0.38         | 6.25 | 3.44 | 0.55 | 77   | 35                | 42                 | 65                 | 23                         | 42        | * |
| MSE V           | t 6                | 0.67 (0.55 - 0.76) | $\geq 0.37$ | 0.67     | 1.19  | 0.19         | 2.69 | 1.30 | 0.48 | 55   | 32                | 23                 | 41                 | 21                         | 20        | * |
|                 |                    |                    | $\geq 0.62$ | 0.64     | 1.34  | 0.34         | 4.27 | 2.35 | 0.55 | 69   | 35                | 34                 | 56                 | 23                         | 33        |   |
|                 | t 1                | 0.70 (0.58 - 0.79) | $\geq 0.29$ | 0.70     | 1.34  | 0.34         | 4.43 | 1.81 | 0.41 | 63   | 29                | 34                 | 49                 | 18                         | 31        | * |
|                 |                    |                    | $\geq 0.33$ | 0.63     | 1.32  | 0.32         | 3.89 | 2.18 | 0.56 | 68   | 35                | 33                 | 54                 | 23                         | 31        |   |
|                 | t 2                | 0.71 (0.59 - 0.79) | $\geq 0.36$ | 0.71     | 1.36  | 0.36         | 4.00 | 1.53 | 0.38 | 60   | 27                | 33                 | 45                 | 17                         | 28        | * |
|                 | t 3                | 0.70 (0.58 - 0.79) | $\geq 0.39$ | 0.72     | 1.38  | 0.38         | 5.37 | 1.94 | 0.36 | 65   | 26                | 39                 | 51                 | 16                         | 35        | * |
| t 4             | 0.71 (0.59 - 0.79) | $\geq 0.42$        | 0.72        | 1.40     | 0.40  | 5.65         | 2.09 | 0.37 | 67   | 26   | 41                | 53                 | 17                 | 36                         | *         |   |
| t 5             | 0.70 (0.58 - 0.79) | $\geq 0.42$        | 0.72        | 1.40     | 0.40  | 5.65         | 2.09 | 0.37 | 67   | 26   | 41                | 53                 | 17                 | 36                         | *         |   |
| t 6             | 0.69 (0.58 - 0.78) | $\geq 0.41$        | 0.70        | 1.36     | 0.36  | 4.71         | 1.93 | 0.41 | 65   | 28   | 37                | 51                 | 18                 | 33                         | *         |   |
| RCMSE AP        | t 1                | 0.66 (0.54 - 0.76) | $\geq 0.21$ | 0.68     | 1.11  | 0.11         | 2.80 | 1.14 | 0.41 | 52   | 28                | 24                 | 38                 | 18                         | 20        | * |
|                 |                    |                    | $\geq 0.35$ | 0.56     | 1.34  | 0.34         | 3.94 | 2.60 | 0.66 | 71   | 39                | 32                 | 58                 | 26                         | 32        |   |
|                 | t 2                | 0.65 (0.53 - 0.74) | $\geq 0.16$ | 0.68     | 1.06  | 0.06         | 4.17 | 1.06 | 0.26 | 50   | 19                | 31                 | 36                 | 12                         | 24        | * |

|                        |                        |                        |             |      |      |      |      |      |      |    |    |    |    |    |    |   |
|------------------------|------------------------|------------------------|-------------|------|------|------|------|------|------|----|----|----|----|----|----|---|
| RCMSE<br>ML            | t 3 0.66 (0.55 - 0.76) | $\geq 0.33$            | 0.64        | 1.28 | 0.28 | 3.18 | 1.81 | 0.57 | 63   | 35 | 28 | 49 | 23 | 26 | *  |   |
|                        |                        | $\geq 0.16$            | 0.68        | 1.06 | 0.06 | 3.06 | 1.04 | 0.34 | 50   | 25 | 25 | 36 | 15 | 21 |    |   |
|                        |                        | $\geq 0.39$            | 0.61        | 1.26 | 0.26 | 2.98 | 1.85 | 0.62 | 64   | 37 | 27 | 50 | 25 | 25 | *  |   |
|                        | t 4 0.67 (0.55 - 0.76) | $\geq 0.30$            | 0.68        | 1.23 | 0.23 | 3.16 | 1.38 | 0.44 | 57   | 29 | 28 | 43 | 19 | 24 |    |   |
|                        |                        | $\geq 0.36$            | 0.65        | 1.30 | 0.30 | 3.46 | 1.87 | 0.54 | 65   | 35 | 30 | 50 | 23 | 27 | *  |   |
|                        |                        | $\geq 0.30$            | 0.69        | 1.23 | 0.23 | 3.36 | 1.37 | 0.41 | 57   | 28 | 29 | 42 | 18 | 24 |    |   |
|                        | t 5 0.68 (0.56 - 0.77) | $\geq 0.38$            | 0.64        | 1.28 | 0.28 | 3.16 | 1.77 | 0.56 | 63   | 35 | 28 | 49 | 23 | 26 | *  |   |
|                        |                        | $\geq 0.27$            | 0.71        | 1.23 | 0.23 | 5.22 | 1.33 | 0.26 | 56   | 19 | 37 | 42 | 12 | 30 | *  |   |
|                        |                        | $\geq 0.38$            | 0.63        | 1.26 | 0.26 | 2.92 | 1.72 | 0.59 | 63   | 37 | 26 | 48 | 24 | 24 |    |   |
|                        | RCMSE<br>V             | t 1 0.67 (0.55 - 0.77) | $\geq 0.26$ | 0.73 | 1.42 | 0.42 | 6.53 | 2.09 | 0.32 | 67 | 24 | 43 | 53 | 15 | 38 | * |
|                        |                        |                        | $\geq 0.33$ | 0.70 | 1.42 | 0.42 | 5.93 | 2.55 | 0.43 | 71 | 30 | 41 | 58 | 19 | 39 | * |
|                        |                        |                        | $\geq 0.30$ | 0.70 | 1.32 | 0.32 | 4.43 | 1.67 | 0.38 | 62 | 28 | 34 | 47 | 17 | 30 |   |
| t3 0.67 (0.55 - 0.76)  |                        | $\geq 0.36$            | 0.68        | 1.36 | 0.36 | 4.52 | 2.17 | 0.48 | 68   | 32 | 36 | 54 | 21 | 33 | *  |   |
|                        |                        | $\geq 0.32$            | 0.70        | 1.30 | 0.30 | 4.10 | 1.61 | 0.39 | 61   | 27 | 34 | 46 | 17 | 29 |    |   |
|                        |                        | $\geq 0.39$            | 0.67        | 1.36 | 0.36 | 4.57 | 2.24 | 0.49 | 69   | 32 | 37 | 55 | 21 | 34 | *  |   |
| t 5 0.66 (0.54 - 0.76) |                        | $\geq 0.36$            | 0.69        | 1.32 | 0.32 | 3.99 | 1.76 | 0.44 | 63   | 30 | 33 | 49 | 19 | 30 |    |   |
|                        |                        | $\geq 0.39$            | 0.67        | 1.36 | 0.36 | 4.57 | 2.24 | 0.49 | 69   | 32 | 37 | 55 | 21 | 34 | *  |   |
|                        |                        | $\geq 0.37$            | 0.69        | 1.32 | 0.32 | 3.99 | 1.76 | 0.44 | 63   | 30 | 33 | 49 | 19 | 30 | *  |   |
| RCMSE<br>V             |                        | t 6 0.65 (0.53 - 0.75) | $\geq 0.42$ | 0.64 | 1.32 | 0.32 | 3.84 | 2.11 | 0.55 | 67 | 35 | 32 | 53 | 23 | 30 |   |
|                        |                        |                        | $\geq 0.23$ | 0.70 | 1.30 | 0.30 | 4.10 | 1.61 | 0.39 | 61 | 27 | 34 | 46 | 17 | 29 |   |
|                        |                        |                        | $\geq 0.27$ | 0.66 | 1.34 | 0.34 | 4.12 | 2.10 | 0.51 | 67 | 33 | 34 | 53 | 22 | 31 | * |
|                        | t 2 0.67 (0.56 - 0.77) | $\geq 0.24$            | 0.70        | 1.27 | 0.27 | 3.94 | 1.46 | 0.37 | 58   | 26 | 32 | 44 | 17 | 27 |    |   |
|                        |                        | $\geq 0.30$            | 0.64        | 1.32 | 0.32 | 3.82 | 2.10 | 0.55 | 67   | 35 | 32 | 53 | 23 | 30 | *  |   |
|                        |                        | $\geq 0.24$            | 0.70        | 1.27 | 0.27 | 4.26 | 1.45 | 0.34 | 58   | 25 | 33 | 44 | 15 | 29 |    |   |
|                        | t 3 0.68 (0.56 - 0.77) | $\geq 0.31$            | 0.65        | 1.32 | 0.32 | 3.78 | 2.04 | 0.54 | 67   | 35 | 32 | 52 | 23 | 29 | *  |   |
|                        |                        | $\geq 0.21$            | 0.68        | 1.13 | 0.13 | 3.15 | 1.17 | 0.37 | 53   | 26 | 27 | 39 | 17 | 22 |    |   |
|                        |                        | $\geq 0.32$            | 0.65        | 1.32 | 0.32 | 3.78 | 2.04 | 0.54 | 67   | 35 | 32 | 52 | 23 | 29 | *  |   |
|                        | t 5 0.67 (0.55 - 0.76) | $\geq 0.25$            | 0.69        | 1.25 | 0.25 | 3.42 | 1.43 | 0.42 | 58   | 29 | 29 | 44 | 18 | 26 |    |   |
|                        |                        | $\geq 0.32$            | 0.65        | 1.30 | 0.30 | 3.46 | 1.87 | 0.54 | 65   | 35 | 30 | 50 | 23 | 27 | *  |   |
|                        |                        | $\geq 0.24$            | 0.69        | 1.21 | 0.21 | 3.33 | 1.32 | 0.40 | 56   | 28 | 28 | 42 | 18 | 24 |    |   |
| CI RCMSE AP            | 0.71 (0.59 - 0.80)     | $\geq 0.34$            | 0.64        | 1.30 | 0.30 | 3.49 | 1.92 | 0.55 | 65   | 35 | 30 | 51 | 23 | 28 | *  |   |
|                        |                        | $\geq 0.34$            | 0.64        | 1.30 | 0.30 | 3.49 | 1.92 | 0.55 | 65   | 35 | 30 | 51 | 23 | 28 | *  |   |
|                        |                        | $\geq 0.34$            | 0.64        | 1.30 | 0.30 | 3.49 | 1.92 | 0.55 | 65   | 35 | 30 | 51 | 23 | 28 | *  |   |
|                        | CI MSE AP              | 0.71 (0.59 - 0.80)     | $\geq 0.22$ | 0.68 | 1.34 | 0.34 | 4.17 | 1.93 | 0.46 | 65 | 31 | 34 | 51 | 20 | 31 | * |
|                        |                        | 0.69 (0.57 - 0.78)     | $\geq 0.17$ | 0.69 | 1.25 | 0.25 | 3.42 | 1.43 | 0.42 | 58 | 29 | 29 | 44 | 18 | 26 | * |
|                        |                        | 0.71 (0.59 - 0.80)     | $\geq 0.19$ | 0.72 | 1.40 | 0.40 | 5.65 | 2.09 | 0.37 | 67 | 26 | 41 | 53 | 17 | 36 | * |
|                        | CI RCMSE AP            | 0.67 (0.55 - 0.76)     | $\geq 0.63$ | 0.66 | 1.28 | 0.28 | 3.27 | 1.67 | 0.51 | 62 | 33 | 29 | 47 | 22 | 25 | * |
|                        |                        | 0.67 (0.55 - 0.76)     | $\geq 0.17$ | 0.70 | 1.38 | 0.38 | 4.99 | 2.10 | 0.42 | 67 | 29 | 38 | 53 | 18 | 35 | * |
|                        |                        | 0.67 (0.56 - 0.77)     | $\geq 0.15$ | 0.67 | 1.34 | 0.34 | 4.12 | 2.04 | 0.50 | 66 | 32 | 34 | 52 | 21 | 31 | * |
